# Supplementary material
Source: HighWire-hosted journal article supplement (https://oem.bmj.com/content/oemed-2020-106439)
Supplement: inline-supplementary-material-1 [file inline-supplementary-material-1.pdf]

## Online appendix 1: Handling of HbA<sub>1c</sub> < 4% NGSP

As described in the main text, the HemoCue HbA<sub>1c</sub> 501 censored HbA<sub>1c</sub> results < 4% NGSP (20 mmol/mol), and a numerical value had to be assigned to these results before they could be included in analyses.

When assigning a fixed value to measurements < LOQ (limit of quantitation), one of the common approaches<sup>1</sup> is to use  $x = \frac{LOQ}{\sqrt{2}}$ . Implicitly, this approach assumes that data below the LOQ follow a triangular distribution between zero and LOQ.<sup>1</sup> However, we deemed this an invalid assumption in the case of our data, as an HbA<sub>1c</sub> of 0% NGSP is most likely incompatible with life.

3% NGSP (9 mmol/mol) is equivalent to an estimated average glucose of 2.2 mmol/l,<sup>2</sup> so we considered it the lower limit of the physiological range (LLPR) for HbA<sub>1c</sub>. We assumed that HbA<sub>1c</sub> values < LOQ followed a triangular distribution between LLPR and LOQ, as shown schematically in Figure A.

Figure A: Schematic presentation of the distribution of HbA<sub>1c</sub> values, including values < LOQ

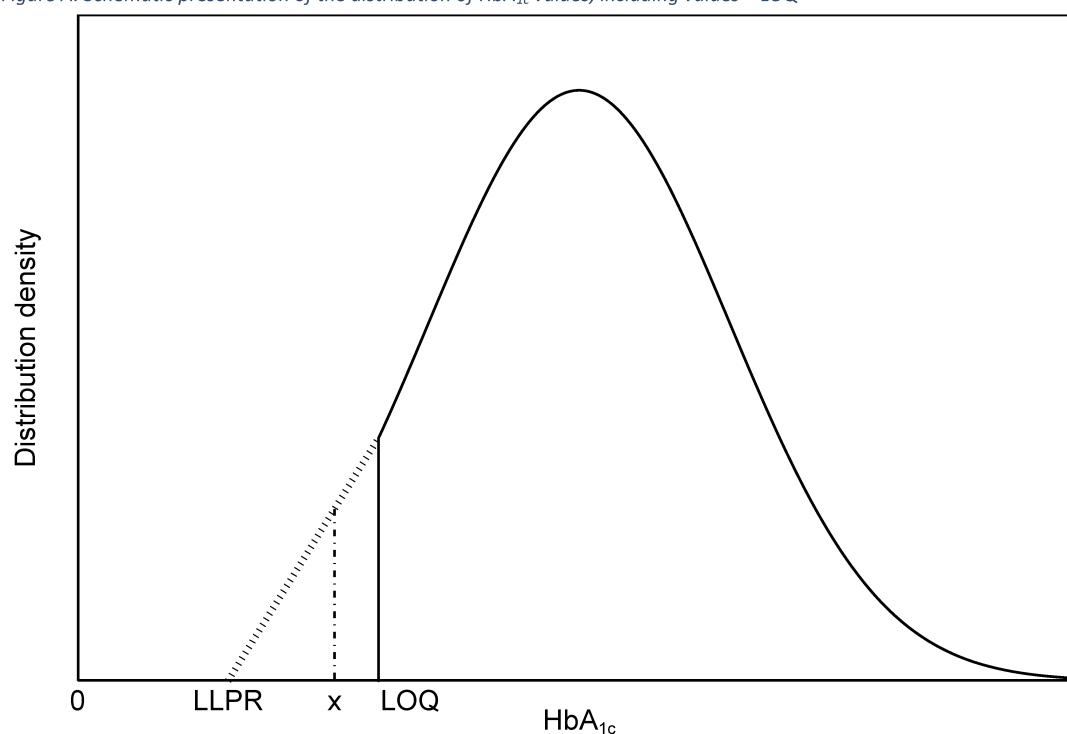

Figure is not to scale.

In the terminology of Figure A, we want to replace all results < LOQ with  $x$ , where  $x$  is the value of HbA<sub>1c</sub> that results in the triangle from LLPR to  $x$  having half the area of the triangle from LLPR to LOQ.<sup>1</sup> If the slopes of the hypotenuses are called  $b$ , this can be written as

Equation A

$$\frac{1}{2} \times \left( \frac{1}{2} \times b \times (LOQ - LLPR)^2 \right) = \left( \frac{1}{2} \times b \times (x - LLPR)^2 \right)$$

By simple algebra, this can be rearranged to

Equation B

$$x = LLPR + \frac{LOQ - LLPR}{\sqrt{2}}$$

The numerical value of  $x$  can then be calculated as  $x = 3.71\%$  NGSP or  $x = 16.8 \text{ mmol/mol}$ , which was the value we assigned to all measurements < LOQ.

#### References for this appendix

- 1 Hornung RW, Reed LD. Estimation of average concentration in the presence of nondetectable values. *Applied occupational and environmental hygiene* 1990;5:46-51.
- 2 NGSP (National Glycohemoglobin Standardization Program). Convert between NGSP, IFCC and eAG. <http://www.ngsp.org/convert1.asp>; accessed 2020-01-14.
