# Supplementary material
Source: HighWire-hosted journal article supplement (https://oem.bmj.com/content/oemed-2020-106439)
Supplement: inline-supplementary-material-4 [file inline-supplementary-material-4.pdf]

## Online appendix 3: Pesticide use statistics based on questionnaire data

| Compound                                     |                              |                                | Phase 1                     |                         | Phase 2                        |                         | Phase 3                        |                         |          |
|----------------------------------------------|------------------------------|--------------------------------|-----------------------------|-------------------------|--------------------------------|-------------------------|--------------------------------|-------------------------|----------|
|                                              |                              |                                | Ever used<br>n (%)          | Used last week<br>n (%) | Used since last phase<br>n (%) | Used last week<br>n (%) | Used since last phase<br>n (%) | Used last week<br>n (%) |          |
| Any pesticide                                |                              |                                | 283 (77.7%)                 | 80 (22.0%)              | 173 (48.6%)                    | 77 (21.6%)              | 133 (37.6%)                    | 71 (20.1%)              |          |
| Any organophosphate or carbamate insecticide |                              |                                | 133 (36.5%)                 | 22 (6.0%)               | 43 (12.1%)                     | 15 (4.2%)               | 40 (11.3%)                     | 20 (5.6%)               |          |
| Insecticide                                  | Organophosphate              | Chlorpyrifos                   | 8 (2.2%)                    | 3 (0.8%)                | 3 (0.8%)                       | 0 (0.0%)                | 1 (0.3%)                       | 0 (0.0%)                |          |
|                                              |                              | Diazinon                       | 1 (0.3%)                    | 0 (0.0%)                | 0 (0.0%)                       | 0 (0.0%)                | 1 (0.3%)                       | 0 (0.0%)                |          |
|                                              |                              | Dichlorvos                     | 16 (4.4%)                   | 4 (1.1%)                | 6 (1.7%)                       | 3 (0.8%)                | 10 (2.8%)                      | 6 (1.7%)                |          |
|                                              |                              | Dimethoate                     | 11 (3.0%)                   | 1 (0.3%)                | 5 (1.4%)                       | 2 (0.6%)                | 1 (0.3%)                       | 1 (0.3%)                |          |
|                                              |                              | Profenofos                     | 114 (31.3%)                 | 15 (4.1%)               | 30 (8.4%)                      | 10 (2.8%)               | 30 (8.5%)                      | 14 (4.0%)               |          |
|                                              | Organophosphate + pyrethroid |                                | Chlorpyrifos + cypermethrin | 0 (0.0%)                | 0 (0.0%)                       | 1 (0.3%)                | 1 (0.3%)                       | 2 (0.6%)                | 2 (0.6%) |
|                                              | Carbamate                    | Bendiocarb                     | 1 (0.3%)                    | 0 (0.0%)                | 0 (0.0%)                       | 0 (0.0%)                | 0 (0.0%)                       | 0 (0.0%)                |          |
|                                              |                              | Carbofuran                     | 2 (0.5%)                    | 0 (0.0%)                | 0 (0.0%)                       | 0 (0.0%)                | 0 (0.0%)                       | 0 (0.0%)                |          |
|                                              | Pyrethroid                   | Alpha-cypermethrin             | 5 (1.4%)                    | 2 (0.5%)                | 1 (0.3%)                       | 1 (0.3%)                | 1 (0.3%)                       | 1 (0.3%)                |          |
|                                              |                              | Cypermethrin                   | 108 (29.7%)                 | 22 (6.0%)               | 45 (12.6%)                     | 18 (5.1%)               | 37 (10.5%)                     | 18 (5.1%)               |          |
|                                              |                              | Deltamethrin                   | 3 (0.8%)                    | 0 (0.0%)                | 1 (0.3%)                       | 1 (0.3%)                | 0 (0.0%)                       | 0 (0.0%)                |          |
|                                              |                              | Lambda-cyhalothrin             | 4 (1.1%)                    | 0 (0.0%)                | 3 (0.8%)                       | 2 (0.6%)                | 3 (0.8%)                       | 1 (0.3%)                |          |
|                                              |                              | Unknown pyrethroid insecticide | 1 (0.3%)                    | 0 (0.0%)                | 0 (0.0%)                       | 0 (0.0%)                | 0 (0.0%)                       | 0 (0.0%)                |          |
|                                              | Avermectin + neonicotinoid   |                                | Abamectin + Acetamiprid     | 5 (1.4%)                | 3 (0.8%)                       | 11 (3.1%)               | 6 (1.7%)                       | 4 (1.1%)                | 1 (0.3%) |
|                                              | Neonicotinoid                |                                | Imidacloprid                | 0 (0.0%)                | 0 (0.0%)                       | 1 (0.3%)                | 1 (0.3%)                       | 0 (0.0%)                | 0 (0.0%) |
|                                              | Octopamine receptor agonist  |                                | Amitraz                     | 0 (0.0%)                | 0 (0.0%)                       | 2 (0.6%)                | 1 (0.3%)                       | 2 (0.6%)                | 2 (0.6%) |
| Azadirachtin                                 |                              | Azadirachtin                   | 1 (0.3%)                    | 1 (0.3%)                | 3 (0.8%)                       | 2 (0.6%)                | 0 (0.0%)                       | 0 (0.0%)                |          |
| Unknown                                      |                              | Unknown insecticide            | 28 (7.7%)                   | 10 (2.7%)               | 42 (11.8%)                     | 18 (5.1%)               | 29 (8.2%)                      | 17 (4.8%)               |          |
| Herbicide                                    | 2,4-D                        |                                | 49 (13.5%)                  | 9 (2.5%)                | 15 (4.2%)                      | 5 (1.4%)                | 7 (2.0%)                       | 3 (0.8%)                |          |
|                                              | Atrazine                     |                                | 1 (0.3%)                    | 0 (0.0%)                | 0 (0.0%)                       | 0 (0.0%)                | 0 (0.0%)                       | 0 (0.0%)                |          |
|                                              | Glyphosate                   |                                | 157 (43.1%)                 | 24 (6.6%)               | 55 (15.4%)                     | 16 (4.5%)               | 29 (8.2%)                      | 13 (3.7%)               |          |
|                                              | Paraquat                     |                                | 9 (2.5%)                    | 1 (0.3%)                | 1 (0.3%)                       | 1 (0.3%)                | 3 (0.8%)                       | 1 (0.3%)                |          |
|                                              | Unknown herbicide            |                                | 1 (0.3%)                    | 1 (0.3%)                | 0 (0.0%)                       | 0 (0.0%)                | 0 (0.0%)                       | 0 (0.0%)                |          |
| Fungicide                                    | Mancozeb                     |                                | 46 (12.6%)                  | 15 (4.1%)               | 30 (8.4%)                      | 18 (5.1%)               | 27 (7.6%)                      | 22 (6.2%)               |          |
|                                              | Propamocarb hydrochloride    |                                | 0 (0.0%)                    | 0 (0.0%)                | 0 (0.0%)                       | 0 (0.0%)                | 1 (0.3%)                       | 0 (0.0%)                |          |
|                                              | Unknown fungicide            |                                | 0 (0.0%)                    | 0 (0.0%)                | 1 (0.3%)                       | 1 (0.3%)                | 0 (0.0%)                       | 0 (0.0%)                |          |
| Unknown                                      | Sulphur                      |                                | 0 (0.0%)                    | 0 (0.0%)                | 1 (0.3%)                       | 0 (0.0%)                | 0 (0.0%)                       | 0 (0.0%)                |          |
|                                              | Unknown pesticide            |                                | 22 (6.0%)                   | 7 (1.9%)                | 24 (6.7%)                      | 11 (3.1%)               | 18 (5.1%)                      | 7 (2.0%)                |          |

All percentages are relative to the number of participants in each phase (364 in phase 1, 356 in phase 2, and 354 in phase 3).

Participants who reported having used/mixed any pesticides were asked which up to three pesticides they had used/mixed the most, and if they had used/mixed the compounds in the week prior to the interview. Participants also were asked for up three additional pesticides that they had used/mixed in the last week. Showcards of trade names of commonly used pesticides in the study area were used to improve recall.
