# Supplementary material
Source: HighWire-hosted journal article supplement (https://oem.bmj.com/content/oemed-2020-106439)
Supplement: inline-supplementary-material-5 [file inline-supplementary-material-5.pdf]

## Online appendix 4: Personal Protective Equipment (PPE) use statistics based on questionnaire data

| PPE type                      | Never<br>(0% of the time) | Rarely<br>(25% of the time) | Sometimes<br>(50% of the time) | Most of the time<br>(75% of the time) | All of the time<br>(100% of the time) |
|-------------------------------|---------------------------|-----------------------------|--------------------------------|---------------------------------------|---------------------------------------|
| Gumboots                      | 70 (24.7%)                | 7 (2.5%)                    | 16 (5.7%)                      | 24 (8.5%)                             | 166 (58.7%)                           |
| Gaiters                       | 283 (100.0%)              | 0 (0.0%)                    | 0 (0.0%)                       | 0 (0.0%)                              | 0 (0.0%)                              |
| Long pants                    | 172 (60.8%)               | 0 (0.0%)                    | 0 (0.0%)                       | 5 (1.8%)                              | 106 (37.5%)                           |
| Waterproof pants              | 278 (98.2%)               | 1 (0.4%)                    | 1 (0.4%)                       | 0 (0.0%)                              | 3 (1.1%)                              |
| Long sleeve shirt             | 169 (59.7%)               | 6 (2.1%)                    | 29 (10.2%)                     | 11 (3.9%)                             | 68 (24.0%)                            |
| Rubber apron                  | 279 (98.6%)               | 2 (0.7%)                    | 0 (0.0%)                       | 1 (0.4%)                              | 1 (0.4%)                              |
| Poncho                        | 280 (98.9%)               | 0 (0.0%)                    | 1 (0.4%)                       | 0 (0.0%)                              | 2 (0.7%)                              |
| Overall or kimono             | 270 (95.4%)               | 0 (0.0%)                    | 3 (1.1%)                       | 2 (0.7%)                              | 8 (2.8%)                              |
| Gloves                        | 250 (88.3%)               | 3 (1.1%)                    | 6 (2.1%)                       | 4 (1.4%)                              | 20 (7.1%)                             |
| Cloth/handkerchief over mouth | 257 (90.8%)               | 0 (0.0%)                    | 0 (0.0%)                       | 0 (0.0%)                              | 26 (9.2%)                             |
| Mask without carbon filter    | 260 (91.9%)               | 0 (0.0%)                    | 4 (1.4%)                       | 1 (0.4%)                              | 18 (6.4%)                             |
| Mask with carbon filter       | 276 (97.5%)               | 1 (0.4%)                    | 1 (0.4%)                       | 0 (0.0%)                              | 5 (1.8%)                              |
| Cap                           | 240 (84.8%)               | 4 (1.4%)                    | 8 (2.8%)                       | 3 (1.1%)                              | 28 (9.9%)                             |
| Glasses                       | 276 (97.5%)               | 1 (0.4%)                    | 1 (0.4%)                       | 0 (0.0%)                              | 5 (1.8%)                              |

All numbers are n (%). Results based on the 283 participants who reported in phase 1 that they had ever used or mixed pesticides. We did not ask about the use of PPE in phases 2 and 3.

For each type of PPE except "Cloth/handkerchief over mouth", participants were shown a picture of the PPE and asked "Do you wear this protective equipment when preparing or applying pesticides?". Anyone who responded "yes" was then asked "How often do you use this protective equipment when preparing or applying pesticides?". If participants used any other forms of PPE that we had not asked about specifically, the PPE was recorded in free-text. The only other form of PPE mentioned by more than a couple of participants was "Cloth/handkerchief over mouth".
